# Supplementary material for: Video-Based Interviewing in Medicine: A Scoping Review
Source: Research Square preprint supplement (doi:10.21203/rs.3.rs-468538/v1), 2021-05-06
Supplement: Supplementary file 1 [file 1934e514e01504b2ea643dca.xlsx]

## Sheet: Sheet1
Table 1. Major outcomes presented thematically.
Author	Year Published	Title	Environmental Costs	Financial Costs	Opportunity Costs	Technological Issues	Body Language	Impact on Rank List	Study Limitations
Winfield-Dial et al.	2018	Demographic differences between high and low scorers on the standardized video interview	Not reported	Not reported	Not reported	Not reported	Not reported	Not reported	Not reported
Winfield-Dial et al.	2018	Applicant attitudes towards the standardized video interview-an interim analysis	Not reported	Not reported	Not reported	Not reported	Not reported	Not reported	Not reported
Humbert et al.	2018	Correlation of the standard video interview score with an established application review process	Not reported	Not reported	Not reported	Not reported	Not reported	Not reported	Not reported
Naemi et al.	2019	Examining the relationship between the AAMC standardized video interview and step 2 CS subscores	Not reported	Not reported	Not reported	Not reported	Not reported	Not reported	Not reported
Chukwumah et al.	2010	The use of remote computer audio-video processing to conduct surgical fellowship interviews of deployed physicians	Not reported	Not reported	Not reported	Not reported	Not reported	Not reported	Not reported
Chandler et al.	2019	Efficacy of Videoconference Interviews in the Pediatric Surgery Match	Not reported	Financial cost was a hardship for applicants; video conferencing comes without the cost and inconvenience of travel	90% of applicants reported that the amount of time spent for interviews was a hardship; applicants may appear more fatigued or stressed when interviewing during or after a work day	Occasional trouble connecting when the applicants were interviewing from a hospital.	Not reported	Some applicants moved up on rank list following videoconference interview	Recall bias; reliability of survey data; applicants may be biased to provide positive responses (controlled for by administering survey after submission of rank lists)
Chung et al.	2019	How Well Does the Standardized Video Interview Score Correlate with Traditional Interview Performance?	Not reported	Not reported	Not reported	Not reported	Not reported	Not reported	Sample size; traditional interviews were not structured (low interrater reliability amongst interviewers)
Brietkpof et al.	2018	One way video interviewing as a method to augment the residency application	Not reported	Not reported	Not reported	Not reported	Not reported	Positive correlation between one-way interview score and rank list position	Not reported
Tiller at al.	2013	Internet-based multiple mini-interviews for candidate selection for graduate entry programmes	Not reported	$50000/year of cost savings for university; substantial cost savings for applicants	Virtual interview provided time savings for applicants	No significant technical concerns, need for some improvement in audio/visual quality	Not reported	Not reported	Naturalistic study design (can't control for crossover); low survey response rate
Brietkpof et al.	2019	Use of Asynchronous Video Interviews for Selecting Obstetrics and Gynecology Residents.	Not reported	Not reported	Delayed in-person interviews by 3 weeks, but this did not have a significant effect on the number of applicants accepting in-person interviews; increased burden of work for program	Not reported	Not reported	Trend towards positive correlation between asynchronous interivew sore and rank list position	Not reported
Daram et al.	2014	Interview from anywhere: Feasibility and utility of web-based videoconference interviews in the gastroenterology fellowship selection process	Not reported	Web-based videoconference interviewing provided cost savings for applicants	Avoiding interview date conflicts; avoiding need to take time-off from work	logistics are simple (high-speed internet, smart phones).	Not reported	Not reported	Small sample size, lack of randomization, selection bias
Deiorio et al.	2019	Applicant Reactions to the AAMC Standardized Video Interview During the 2018 Application Cycle	Not reported	Not reported	Not reported	Not reported	Not reported	Not reported	Recall bias; limited length of surveys
Hakes et al.	2018	Communication and professionalism: Comparing standardized video interview scores to faculty gestalt	Not reported	Not reported	Not reported	Not reported	Not reported	Not reported	Not reported
Edje et al.	2013	Using skype as an alternative for residency selection interviews.	Not reported	There are cost savings for both applicants and interviewers	There are time savings for applicants and interviewers	Voice delay with Skype interviews	Lack of physical contact such as a hand shake was more of a concern for interviewers	Not reported	Not reported
Egan et al.	2019	﻿Standardized video interviews do not correlate to United States medical licensing examination step 1 and step 2 scores	Not reported	Not reported	Not reported	Not reported	Not reported	Not reported	Not all applicants from 2017-2017 application season were included which may limit generalizability
Gallahue at al.	2019	The AAMC Standardized Video Interview: Reactions and Use by Residency Programs During the 2018 Application Cycle	Not reported	Not reported	Not reported	Not reported	Not reported	SVI scores may not be useful in determining who to invite for an interview	Skewed responses to survey questions; hard to expand on their reactions with surveys (qualitative study may be useful); video usage did not reflect the duration of how long the SVI was viewed for
Healy et al.	2017	Videoconference Interviews for an Adult Reconstruction Fellowship: Lessons Learned	Not reported	Not reported	Reduced time spent on interview for applicants and faculty	Not reported	Not reported	Most applicants were comfortable ranking a program after a videoconference interivew	Not reported
Hopson et al.	2019	Comparison of the Standardized Video Interview and Interview Assessments of Professionalism and Interpersonal Communication Skills in Emergency Medicine.	Not reported	Not reported	Not reported	Not reported	Not reported	Not reported	No standardized interview protocol across programs; no valid scoring system available for Professionalism or Interpersonal/Communication Skills
Hopson et al.	2019	The AAMC Standardized Video Interview and the Electronic Standardized Letter of Evaluation in Emergency Medicine: A Comparison of Performance Characteristics	Not reported	Not reported	Not reported	Not reported	Not reported	Not reported	Did not assess the practical significance of SVI/eSLOE correlations
Husain et al.	2019	The Standardized Video Interview: How Does It Affect the Likelihood to Invite for a Residency Interview?.	Not reported	Not reported	Not reported	Not reported	Not reported	SVI score changed the likelihood to invite for an interview in 7% of applicants	No standardization of the selection process; faculty reviewers were NOT blinded to the study purpose; limited experience with SVI to begin with; no standardization to how long the reviewers should watch the videos
Lewis et al.	2018	Standardized video interview scores do not correlate with attending evaluations	Not reported	Not reported	Not reported	Not reported	Not reported	Not reported	Not reported
Willis et al.	2018	Are standardized video interview scores predictive of interview performance?	Not reported	Not reported	Not reported	Not reported	Not reported	Not reported	Small sample size
Bowers et al.	2019	Standard video interview scores and applicant position on residency program list: A correlation study	Not reported	Not reported	Not reported	Not reported	Not reported	No correlation between SVI scores and rank list	Not reported
Hall et al.	2018	Standard video interview score does not correlate with medical student communication skills	Not reported	Not reported	Not reported	Not reported	Not reported	Not reported	Not reported
McHugh et al.	2019	Do standardized or traditional interview questions correlate with the standardized video interview?	Not reported	Not reported	Not reported	Not reported	Not reported	Not reported	Not reported
Staicu et al.	2015	Facetime faceoff: Evaluation of video conferencing as a novel pre-interview screen for a PGY-1 pharmacy residency	Not reported	Video conference interviews reduce applicant travel expenses	Minimal time investment required for videoconference interviews	Unsuccessful video in 22% of interviews, replaced with telephone interviews.	Not reported	Not reported	Not reported
Temple et al.	2014	Streamlining the residency interview process using Web-based teleconferencing.	Not reported	Monetary savings from decreased cost for meals for onsite interviews	Less time taken away from patient care/clinical activity	Few interviews conducted via telephone due to connectivity issues	Loss of video connection prevented evaluation of body language which was part of the evaluation	Not reported	No evaluation of how applicants felt about video-interviews; did not confirm identify of applicant
Hall et al.	2019	Standardized Video Interview Scores Correlate Poorly with Faculty and Patient Ratings.	Not reported	Not reported	Not reported	Not reported	Not reported	Not reported	Small sample size; faculty evaluations group patient care and communication together; inter-rater reliability of faculty evaluations is questionable
Ballejos et al.	2018	An equivalence study of interview platform: Does videoconference technology impact medical school acceptance rates of different groups?.	Not reported	Not reported	Not reported	Not reported	Not reported	No significant change in acceptance rate between face-to-face vs. video interview	Conducted at single medical school; small sample size interviewed by video; may not be generalizable to other schools that are less diverse/rural
Bird et al.	2019	Innovation in Residency Selection: The AAMC Standardized Video Interview.	Not reported	Not reported	Unintended consequence of SVI may be increase in time required for preparation.	Not reported	Not reported	Not reported	Other aspects of selection process like LOE, trainee performance outcomes not assessed; unclear if use of non-physician raters reduced the accuracy of SVI scores
Schnapp et al.	2019	Assessing residency applicants' communication and professionalism: Standardized video interview scores compared to faculty gestalt	Not reported	SVI may not remain free	Not reported	Not reported	Not reported	Not reported	Small sample size; difficult to differentiate between faculty ratings of 1-25; no formalized protocol on how profressionalism/communication should be assesed
Shah et al.	2018	The standardized video interview: How well does the SVI score correlate with traditional interview performance?	Not reported	Not reported	Not reported	Not reported	Not reported	Not reported	Not reported
Shah et al.	2012	Randomized evaluation of a web based interview process for urology resident selection	Not reported	Cost savings for both applicants and programs	Less time taken away from school for applicants	Poor connection quality in several instances; had to re-connect via skype	Not reported	Similar distribution of applicants from each interview type on rank list	Average travel costs may be unestimated given geographic distribution of applicants; change in rank list position during study period may be secondary to improvement in applicant credentials
Vadi et al.	2016	Comparison of web-based and face-to-face interviews for application to an anesthesiology training program: a pilot study	Not reported	Video interviews selected due to financial costs in 25%	Video interviews selected due to inability to get time off in 9.4%	6.3% and 3.1% reproted sub-optimal video and audio quality, respectively.	Not reported	Interview type did not have a significant impact on rank list	No randomization to interview type; single center study; single specialty
Krauss et al.	2018	Correlation between emergency medicine residency applicant's standardized video interview scores and United States medical licensing examination results	Not reported	Not reported	Not reported	Not reported	Not reported	Not reported	Not reported
Williams et al.	2015	Videoconference Interviewing: Tips for Success.	Not reported	Not reported	Not reported	Poor video quality reported 17% of applicants.	Not reported	Most applicants felt that videoconference interview was sufficient for them to determine their rank list	Virtual interview was limited to 30 minutes, which may have affected program's ability to convey aspects of the program
Molina et al.	2020	Virtual Interviews for the Complex General Surgical Oncology Fellowship: The Dana-Farber/Partners Experience.	Not reported	Virtual interview experience eliminated the burden of assocaited costs for the program itself with regards to food and drink, but also the cost of travel for applicants	decreased inconvenience of travel for applicants with virtual interviews; able to maximize the number of faculty members participating in the selectino process with virtual interviews	Not reported	Not reported	Not reported	Not reported
Sripad	2020	Videoconference interviews for female pelvic medicine and reconstructive surgery fellowship during a pandemic: The candidate experience	Not reported	Not reported	Not reported	Not reported	Not reported	Not reported	Not reported
Nutter et al.	2020	Perception of candidates and faculty on maternal fetal medicine fellowship videoconference interviewing	Not reported	Benefit of videoconference interview is cost savings	Benefit of videoconference interview is time savings	Not reported	Not reported	Lack of subjective details from personal interaction	Not reported
McAteer et al.	2020	Videoconference Interviews: A Timely Primary Care Residency Selection Approach	Not reported	55% reduction in costs to the program with initial videoconference interview to screen applicnats	Not reported	Not reported	Not reported	Not reported	Cost estimate does not account for benefits of potential income generated through increased faculty and resident clinical productivity (owing to fewer in-person interview days); unable to quantify benefit of flexible scheduling with virtual interviews; variation in interview procress over the years; poor response rates and non-standardized survey questions
Majumder et al.	2020	Initial Experience with a Virtual Platform for Advanced Gastrointestinal Minimally Invasive Surgery Fellowship Interviews	Not reported	89% of applicants reported cost savings as a strength of virtual interviewing	45% reported a reduction in missed time and improvement in flexibility of scheduling as a benefit of virtual interviewing	33% of applicants mentioned technical issues	Not reported	Not reported	No comparative control in-person interview group; small sample size; bias for applicants to provide favourable responses
Grova et al.	2020	Direct Comparison of In-Person Versus Virtual Interviews for Complex General Surgical Oncology Fellowship in the COVID-19 Era	Not reported	Not reported	Not reported	Not reported	Only 54% of applicants in the virtual interview group, compared to 92% from the face-to-face group, felt that the interview experience was sufficient to make a ranking decision	Virtual interviews need to improve the applicant's ability to gain a feel of the culture of a program and to make a ranking decision	Single-institution study with limited sample size; recall bias; applicants may be biased toward more favourable responses as survey was administered prior to submission of rank lists
Vining et al.	2020	Virtual Surgical Fellowship Recruitment During COVID-19 and Its Implications for Resident/Fellow Recruitment in the Future	Not reported	Applicants highlighted cost savings	Applicants highlight time savings	Faculty expressed ongoing nervousness about technical issues; only one faculty had a temporary technical connectivity problem	Not reported	Not reported	Not reported
